# Supplementary material
Source: ML conference proceedings conference paper supplement (https://openaccess.thecvf.com/content/ICCV2025/html/Wang_ILLUME_Illuminating_Your_ICCV_2025_paper.html)
Supplement: Supplementary file 1 [file Wang_ILLUME_Illuminating_Your_ICCV_2025_supplemental.pdf]

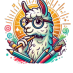

# ILLUME: Illuminating Your LLMs to See, Draw, and Self-Enhance

## Supplementary Materials

Chunwei Wang<sup>1\*</sup>, Guansong Lu<sup>1\*</sup>, Junwei Yang<sup>1\*</sup>, Runhui Huang<sup>2</sup>,  
 Jianhua Han<sup>1</sup>, Lu Hou<sup>1</sup>, Wei Zhang<sup>1</sup>, Hang Xu<sup>1†</sup>  
<sup>1</sup>Huawei Noah’s Ark Lab, <sup>2</sup>The University of Hong Kong

### A. More Implementation Details

**Vision Tokenizer.** We supervise the quantization process within a semantic feature space, which is promising to facilitate the image-text alignment in MLLM training. Given an image  $x$ , it is fed into vision encoder to extract semantic features  $X = \{x_1, \dots, x_N\}$ . The semantic features then pass into a quantizer, which tokenizes  $X$  to a sequence of discrete tokens  $V = \{v_1, \dots, v_N\}$  by looking up a learnable codebook  $\mathcal{C} = \{c_1, \dots, c_K\}$ , where  $K$  is the codebook size. The discrete token  $v_i$  is calculated by assigning  $x_i$  to its closest neighbourhood code in  $\mathcal{C}$  according to the L2 norm:

$$v_i = \arg \min_j \|x_i - c_j\|, v_i \in [0, K - 1] \quad (1)$$

Based on the discrete tokens, we can obtain its quantized embeddings, which is then fed into a decoder to obtain reconstructed semantic features  $X^{rec} = \{x_1^{rec}, \dots, x_N^{rec}\}$ . The quantization process is supervised by the feature reconstruction loss using *cosine loss* and *smoothl1 loss*:

$$\mathcal{L} = \sum_{i=1}^N (\text{smoothl1}(x_i, x_i^{rec}) + (1 - \text{cosine}(x_i, x_i^{rec}))) \quad (2)$$

During training, the vision encoder is kept frozen and only the parameters of quantizer and decoder are updated. It is trained for 80K steps on 80M images with the batch size of 2048, epochs of 2 and learning rate of  $5e-5$ .

To further recover the original pixel space, the reconstructed semantic features are set as conditions and injected to each block of a conditional diffusion model through cross-attention layers. The conditional U-Net is initialized from SDXL and finetuned 80K steps with the batch size of 128 and learning rate of  $2e-5$ . Only the attention layer of U-Net is updated for efficient training. Note that the whole tokenizer training only requires pure image data without corresponding text descriptions.

**More Explanation of MLLM Framework.** In our MLLM framework, we employ a continuous-input discrete-

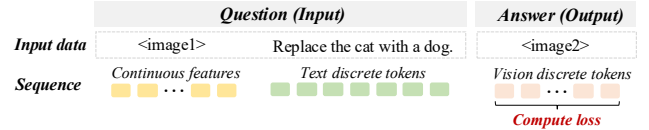

Figure A. An example of data sequence in editing task. The input images are processed through a vision encoder and an adapter while images in the answer are represented as discrete tokens.

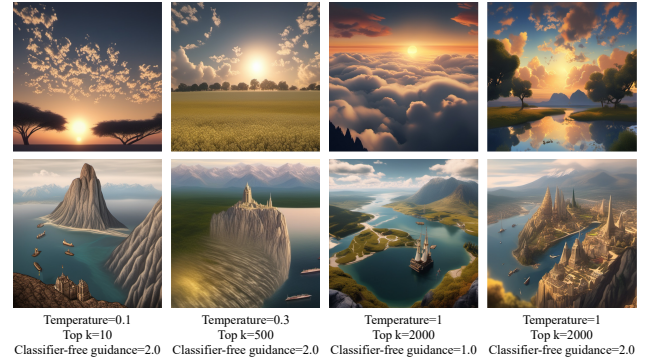

Figure B. Comparison of different hyper-parameters in inference.

output scheme for visual images. Figure A illustrates an example of data sequence under this scheme, where all the data are formatted in QA pairs and we only compute loss and conduct teacher forcing on the answer. The main reason behind this mechanism is to avoid information loss due to vector quantization and improve the visual understanding capability of unified models.

### B. More Results of ILLUME

**More Qualitative Results.** Figure D showcases additional qualitative results for comprehension tasks, demonstrating that our ILLUME model can adeptly handle various comprehension tasks and images with significant differences in aspect ratio. Figures E and Figures F provide further visualizations in text-to-image generation and mixed-modal generation tasks, respectively. In the future, we plan to enhance MLLMs to produce higher resolution images and to support a wider range of mixed-modal generation tasks.

| Method        | Params. | Type           | Basic     |       |         |        |      |         | Advanced |        |         |        |           |         |
|---------------|---------|----------------|-----------|-------|---------|--------|------|---------|----------|--------|---------|--------|-----------|---------|
|               |         |                | Attribute | Scene | Spatial | Action | Part | Overall | Count    | Differ | Compare | Negate | Universal | Overall |
| SDXL          | 2.6B    | Diffusion      | 0.84      | 0.84  | 0.82    | 0.83   | 0.89 | 0.83    | 0.71     | 0.73   | 0.69    | 0.50   | 0.66      | 0.63    |
| LWM           | 7B      | Autoregressive | 0.63      | 0.62  | 0.65    | 0.63   | 0.70 | 0.63    | 0.59     | 0.58   | 0.54    | 0.49   | 0.52      | 0.53    |
| Show-o        | 1.5B    | Autoregressive | 0.72      | 0.72  | 0.70    | 0.70   | 0.75 | 0.70    | 0.70     | 0.62   | 0.71    | 0.51   | 0.65      | 0.60    |
| VILA-U(256)   | 7B      | Autoregressive | 0.78      | 0.78  | 0.77    | 0.78   | 0.79 | 0.76    | 0.70     | 0.71   | 0.74    | 0.53   | 0.66      | 0.64    |
| VILA-U(384)   | 7B      | Autoregressive | 0.75      | 0.76  | 0.75    | 0.73   | 0.75 | 0.73    | 0.68     | 0.67   | 0.71    | 0.51   | 0.64      | 0.61    |
| ILLUME (Ours) | 7B      | Autoregressive | 0.75      | 0.79  | 0.75    | 0.77   | 0.73 | 0.75    | 0.66     | 0.68   | 0.67    | 0.49   | 0.63      | 0.60    |

Table A. Detailed quantitative results on GenAI-bench.

[Turn 1]

### User:

Text description: A tiny brown dog with white patches, eagerly holding a blue and black Frisbee in its mouth, ready to play

Image: {Output image}

Please identify the inconsistencies between the image and text, and analyze them from the following aspects: **Object, Counting, Color, Spatial Relation.**

Give the score and corresponding analysis for each aspect. Please answer in JSON format.

### Assistant:

{**"Object"**: {"Score": 1, "Analysis": "The text describes a dog and a Frisbee, both of which are present in the image. "},  
**"Counting"**: {"Score": 1, "Analysis": "No relation"},  
**"Color"**: {"Score": 0, "Analysis": "The text describes a brown dog with white patches and a blue and black Frisbee, while the image shows a brown dog without white patches and a multicolored Frisbee."},  
**"Spatial Relation"**: {"Score": 0, "Analysis": "The text describes the dog holding the Frisbee in its mouth, but the image shows the Frisbee on the ground."}}

[Turn 2][Additionally for bad generated images]

### User:

Based on the above analysis, carefully generate an image according to the text description: A tiny brown dog with white patches, eagerly holding a blue and black Frisbee in its mouth, ready to play. Please make sure the content of generated image is consistent with the text.

### Assistant:

{GT image}

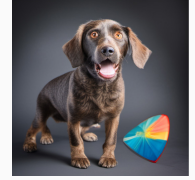

Output image

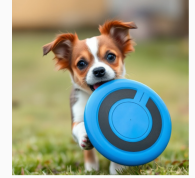

GT image

Figure C. Data example of assessment data for self-enhancing multimodal alignment.

| Encoder | POPE | MME-P         | SEED        | AI2D        | ChartQA     | DocVQA      | InfoVQA     | OCRBench   |
|---------|------|---------------|-------------|-------------|-------------|-------------|-------------|------------|
| SigLIP  | 87.6 | 1404.5        | 65.5        | 55.1        | 54.9        | 60.4        | 38.7        | 414        |
| UNIT    | 87.6 | <b>1452.6</b> | <b>65.8</b> | <b>55.2</b> | <b>56.3</b> | <b>61.4</b> | <b>40.3</b> | <b>440</b> |

Table B. Comparison of UNIT and SigLIP.

**Inference Hyper-parameters.** Figure B presents a comparison of different inference decoding hyperparameters for text-to-image generation. It can be observed that increasing temperature, top-k, and guidance scale all lead to improved visual details.

**Detailed Performance Results on GenAI-bench.** We details per-category performance on GenAI-bench in Table A, where our ILLUME achieves competitive results with current autoregressive-based unified MLLMs.

**Choices of Vision Encoder.** As illustrated in Table B, we adopt UNIT as vision encoder due to its superior performance over SigLIP on document/OCR benchmarks.

**More Ablation of Self-enhancing Multimodal Alignment.** We use GPT-4o to generate assessment labels purely to ensure data quality and Table C shows that replacing GPT-4o with Qwen2.5-VL-72B yields consistent per-

formance gains, indicating the robustness of our approach. We believe that as the unified model becomes stronger (currently based on Vicuna-7B) or with proper data filtering process, it can eventually serve as its own assessor.

| Source of Assessment | Understanding |        |      |      |        |      | Generation Geneval |
|----------------------|---------------|--------|------|------|--------|------|--------------------|
|                      | POPE          | MME-P  | SEED | GQA  | MM-Vet | MMMU |                    |
| baseline             | 86.4          | 1358.6 | 61.7 | 60.0 | 27.4   | 31.2 | 0.56               |
| Qwen2.5-VL-72B       | 86.0          | 1429.6 | 65.9 | 61.0 | 30.3   | 31.9 | 0.58               |
| GPT-4o               | 86.1          | 1446.7 | 66.0 | 60.7 | 29.0   | 32.0 | 0.59               |

Table C. Ablations of different source of the assessment labels.

**Data Examples of Assessment Data.** Figure C illustrates an example of assessment data for self-enhancing multimodal alignment scheme. This example showcases how the data identifies specific reasons for inconsistencies between self-generated images and text descriptions, which aids the model in interpreting images more accurately and helps prevent mistakes during image generation.

**Is the Healthcare Industry Digitally Fit? Our Survey Findings**

Consumers are taking charge of their health using digital tools

45% search for health information on social media channels

4 million mobile health app downloads each day

Only 33% of healthcare providers are digitally mature

**A comparison of Healthcare Providers by Digital Maturity**

| Digital Maturity | Healthcare Providers |
|------------------|----------------------|
| Digital Maturity | Non-Digital Maturity |

**Use of Social Media Channels**

58% use social media to offer services to customers

18% use social media to offer services to customers

**Use of Mobile Channels**

63% use mobile channels to offer services to customers

13% use mobile channels to offer services to customers

**Use of Digital Technologies to Personalize Care**

47% use digital technologies to personalize care

21% use digital technologies to personalize care

**Approach to Digital Transformation**

79% share a common vision towards digital transformation across senior management

28% share a common vision towards digital transformation across senior management

84% allocate adequate funding to digital transformation

31% allocate adequate funding to digital transformation

**Process Digitization**

63% have automated core processes

31% have automated core processes

**Integrated Views of Data**

84% have an integrated view of customer data

33% have an integrated view of customer data

**Investments in Digital Skills**

84% invest in building digital skills

36% invest in building digital skills

**How Can Healthcare Providers Move Up the Digital Curve?**

**Define a Vision and Secure Top Management Buy-in**

- Define transformation goals based on patient needs
- Align existing digital initiatives, processes, systems and digital skill levels

**Establish a Transformation Roadmap and Governance Model to Drive Digital Initiatives**

- Identify quick wins and long-term digital initiatives
- Set up a dedicated Digital Services Unit (DSU)

**Promote Internal Collaboration and Knowledge Sharing to Drive Internal Engagement**

- Build a digital communication backbone through on-line training and knowledge sharing platforms
- Leverage early adopters of digital to help evangelize digital technologies internally

**Prioritize Skill Development and Operational Excellence for a Sustained Digital Advantage**

- Invest in training programs and hire experienced digital professionals
- Streamline operations and develop a single source of truth for customer, operations and financial data

**Source:**

- McKinsey & Company, "Consumer Going Digital With Their Healthcare Experience: How Process Matters," March 2014
- BusinessWeek, "The Top 100's Transformation Road Map," June 2014
- Capgemini Consulting

**Reach out: Interested in reading the full report?**

Head to: <http://www.capgemini-consulting.com/digital-health-survey>

Follow us on Twitter @capgeminiconsulting or email [cs@capgemini.com](mailto:cs@capgemini.com)

**Q: What percent of non-digitally mature healthcare providers do not use digital technologies to personalize care as per the survey?**

**A: 79%**

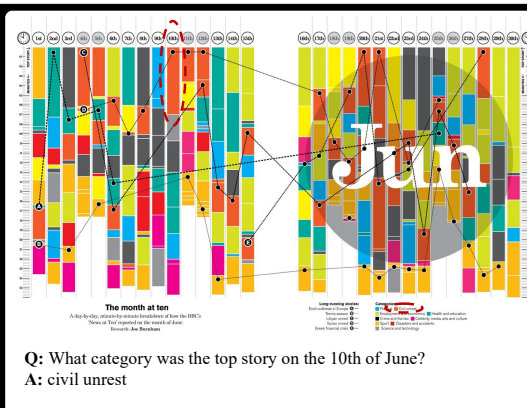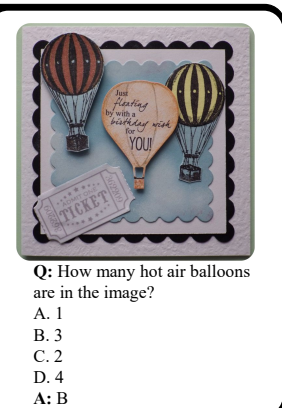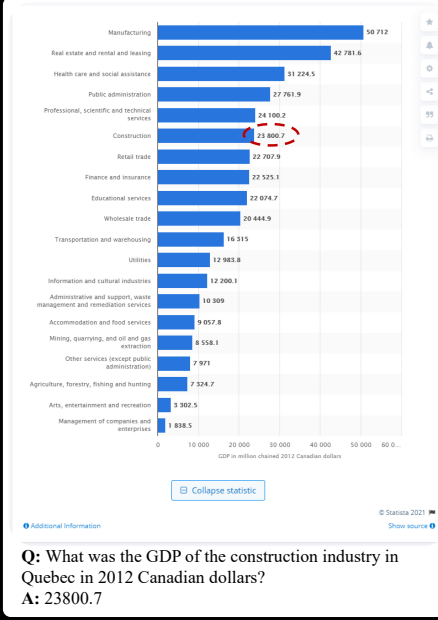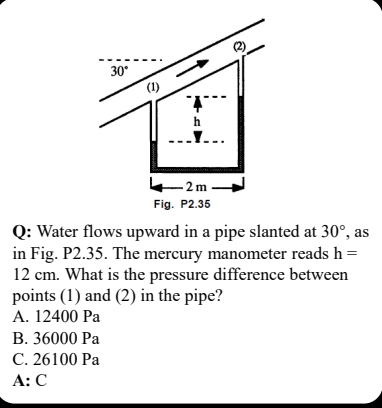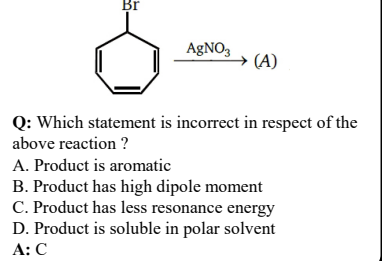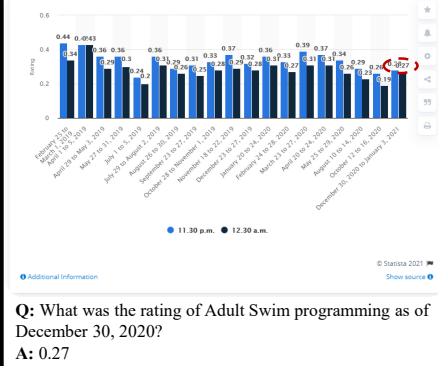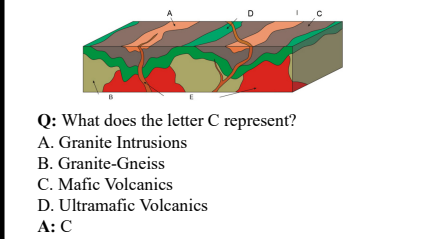

UNIVERSITY OF CALIFORNIA, SAN DIEGO

To: *Paul*

Date: *11/30/82* Time: *2:04 A.M.*

**WHILE YOU WERE OUT**

Dr. *Wilson* 455-8056

Mr. *Wilson*

Ms. *Wilson*

From: *Shippa Clinic*

☒ Telephoned ☐ Will phone again ☐ Please phone

☐ Came to see you ☐ Will come again ☐ Rush

**MESSAGE**

*Re Program Committee meeting. It will probably be 1st or 2nd week in March (1983) rather than latter half. (Moved to cell for)*

Phone party at *Mary*

Taken by *Mary*

Source: <https://www.industrydocuments.ucsf.edu/docs/nkbl0226>

**Q: To whom is the document sent?**

**A: Paul**

Figure D. More qualitative results on understanding tasks. Regions that related to the QAs are marked with red ellipses.



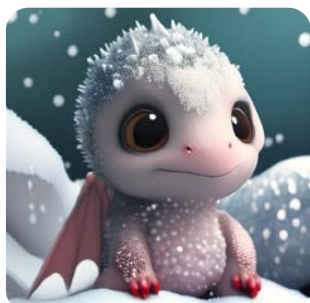

Cute winter dragon baby, kawaii, Pixar, ultra detailed, glacial background, extremely realistic

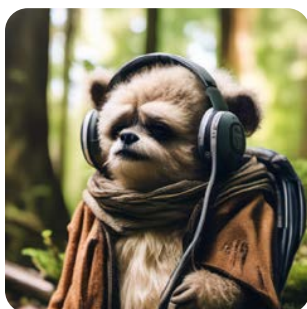

An ewok listening to music in headphones in a forest on a sunny day

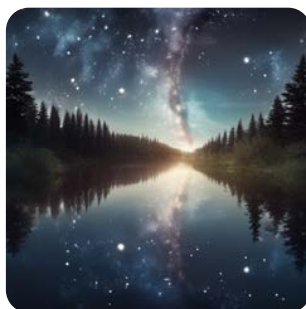

Fantasy, a majestic sky filled with stars and galaxies, overlooking a serene lake

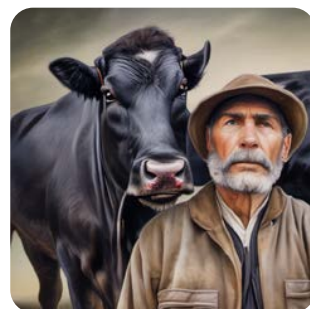

Portrait with farmer and his black cow with horns

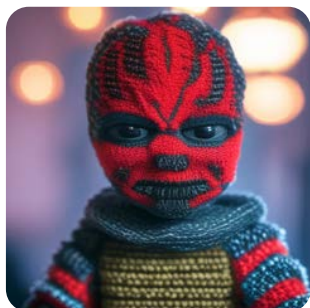

Darth Maul as a knitted wool puppet

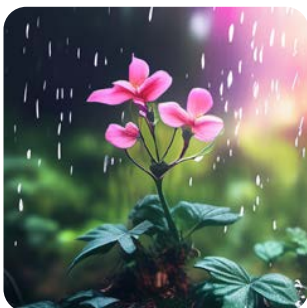

A beautiful photorealistic illustration of spring rain in colorful dark and deep tones.

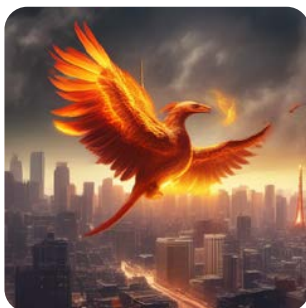

A phoenix soaring above a city, aglow with golden flames

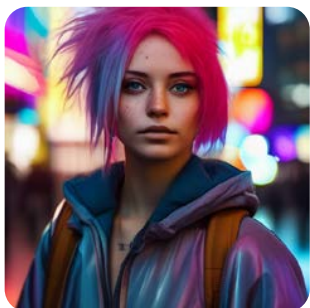

A detailed high resolution photograph of a captivating cyberpunk girl with vibrant pink hair looking intently at the camera as she stands confidently in a bustling cyberpunk town. The lighting features neonlit streets casting a mix of cool blues and warm pinks, highlighting the girl's features and reflecting off the wet pavement. The colors include a palette of bold pinks, blues, and purples, with contrasting dark shadows and bright neon highlights.

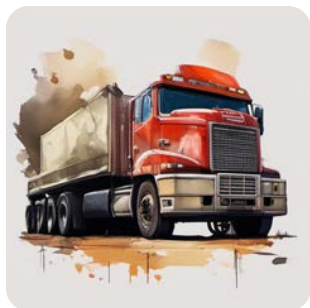

Truck, water color art

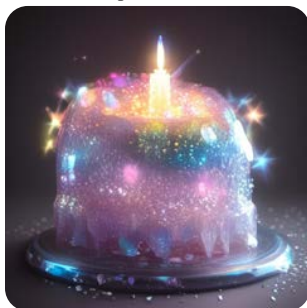

A translucent birthday cake shape traced by light particles

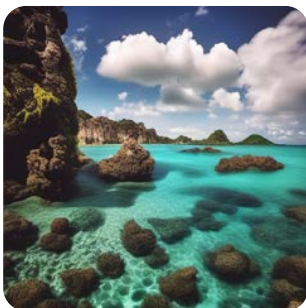

Beautiful landscape photography, summer, Indonesia

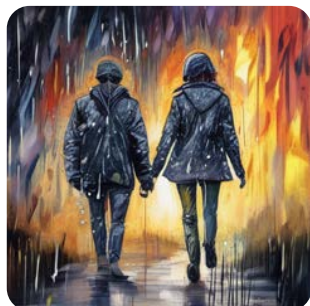

A painting of two people walking together in the rain in the evening, in the style of color splash

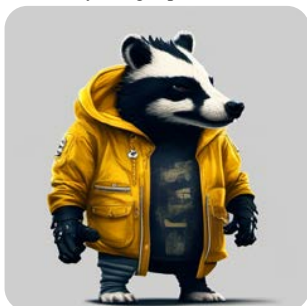

Whole cyberpunk badger wearing a yellow jacket on a white background, cartoon style, cyberpunk

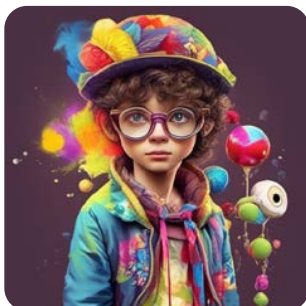

A young boy in an outfit with many different colorful designer items, with colorful hat and cool glasses in the style of fantastical

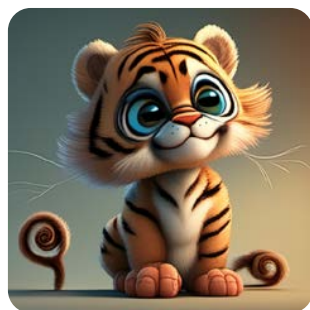

Super cute little tiger rendered in the style of Pixar cartoon, full body, shiny and fluffy, bright big eyes, fluffy tail, sweet smile, energetic and playful, exaggerated facial expression

Figure E. More qualitative results on text-to-image generation tasks.

### Single-turn Editing

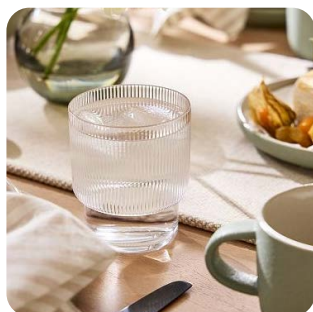

**Object Removal:** Remove the glass on the table

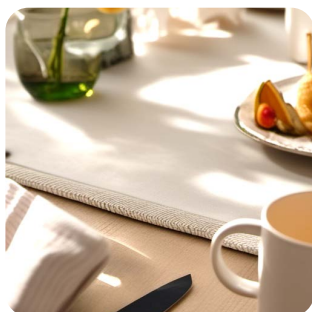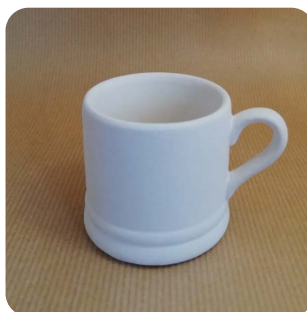

**Material Modification:** Change the texture of the cup to brick

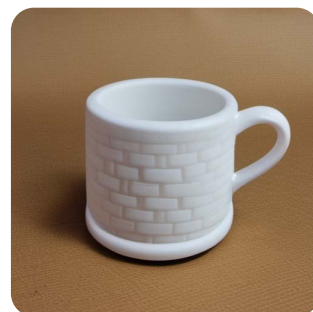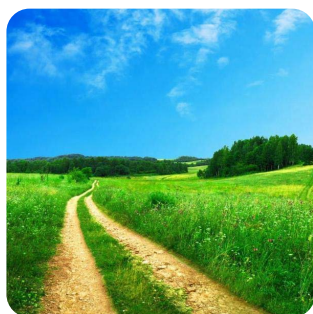

**Style Transfer:** Transform this image into the style of Van Gogh

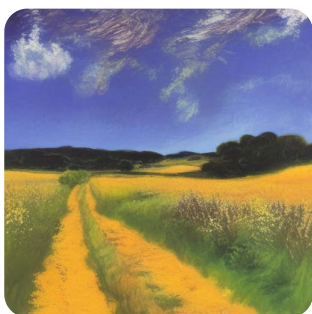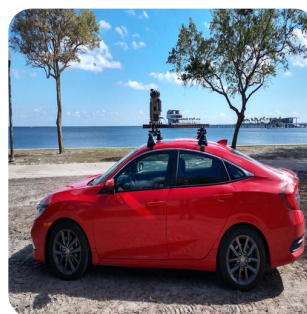

**Color Modification:** Change the color of the car from red to blue

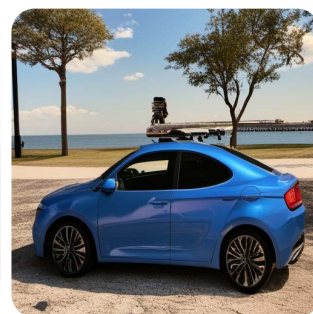

### Multi-turn Editing

#### Turn 1

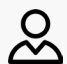

Remove book.

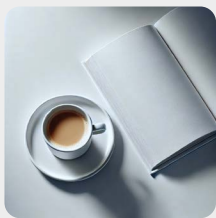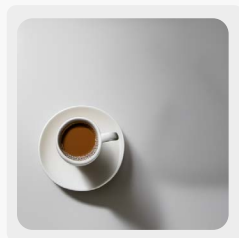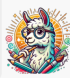

#### Turn 2

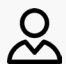

Change the table to marble.

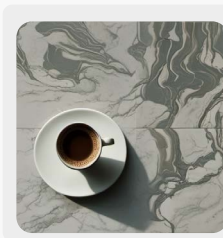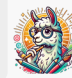

Figure F. More qualitative results on mixed-modal generation tasks.
